## Articles of interest in other COB journals

From *Journal of Cell Science*

### **Ectopic nuclear reorganisation driven by a *Hoxb1* transgene transposed into *Hoxd***

Céline Morey, Nelly R. DaSilva, Marie Kmita, Denis Duboule and Wendy A. Bickmore

Morey, C. et al. 2008. *J. Cell Sci.* doi: 10.1242/jcs.023234

### **A distinct population of clonogenic and multipotent murine follicular keratinocytes residing in the upper isthmus**

Uffe Birk Jensen, Xiaohong Yan, Charlotte Triel, Seung-Hyun Woo, Rikke Christensen and David M. Owens

Jensen, U. B. et al. 2008. *J. Cell Sci.* doi: 10.1242/jcs.025502
